# Supplementary material for: Burst-Like Transcription of Mutant and Wildtype MYH7-Alleles as Possible Origin of Cell-to-Cell Contractile Imbalance in Hypertrophic Cardiomyopathy
Source: PubMed Central journal article supplement (PMC5900384; doi:10.3389/fphys.2018.00359), 2018-04-09
Supplement: Presentation1.pdf [file Presentation1.pdf]

## Supplementary Material

### **Burst-like transcription of mutant and wildtype *MYH7*-alleles as possible origin of cell-to-cell contractile imbalance in hypertrophic cardiomyopathy**

*Judith Montag, Kathrin Kowalski, Mirza Makul, Pia Ernstberger, Ante Radocaj, Julia Beck, Edgar Becker, Snigdha Tripathi, Britta Keyser, Christian Mühlfeld, Kirsten Wissel, Andreas Pich, Jolanda van der Velden, Cristobal G. dos Remedios, Andreas Perrot, Antonio Francino, Francesco Navarro-López, Bernhard Brenner, Theresia Kraft\**

\* Correspondence: Dr. Theresia Kraft: [Kraft.Theresia@mh-hannover.de](mailto:Kraft.Theresia@mh-hannover.de)

#### **1 Supplemental Materials and Methods**

##### **Patients and controls**

The study on anonymized human tissue was approved by the Ethics Committee of Hannover Medical School (No. 2276-2014). Informed consent was obtained according to approved Ethics Committee protocols of the institutions involved. The investigations conformed to the principles of the Declaration of Helsinki (WMA, 1997).

##### **Patient with $\beta$ -MyHC-mutation p.A200V**

This female patient was severely affected by HCM and showed an early disease onset. She was diagnosed with hypertrophic obstructive cardiomyopathy (HOCM) and a myectomy was performed at the age of 19 when the septum thickness had gained 33 mm (posterior wall thickness 16 mm) with a left ventricular outflow tract gradient of 100 mmHg, fractional shortening was 50%, and she was NYHA class II. The septum tissue sample was shock frozen in liquid nitrogen immediately after the myectomy and stored in liquid nitrogen until further use. Genotyping of 24 HCM associated genes revealed the point mutation c.599C>T in  $\beta$ -MyHC, resulting in an exchange of alanine vs. valine at position 200 (p.A200V).

##### **Patients with $\beta$ -MyHC-mutation p.R723G**

Samples of ventricular myocardium of two male HCM patients became available when they received a heart transplant at the age of 55 and 38, respectively. The patients are members of two families from Barcelona, their clinical characteristics were published previously ((Enjuto et al., 2000; Kraft et al., 2013); patient II-5 of family 26, and patient III-1 of family 157). Both had developed the clinical phenotype of HCM with hypertrophy of the interventricular septum and the left ventricular wall. They showed ECG-irregularities including ST-T wave abnormalities; patient II-5 received an implantable cardioverter-defibrillator several years

44 before heart transplantation. The analysis of 24 HCM-associated genes revealed the  
45 previously described mutation c.2167C>G in the ventricular  $\beta$ -myosin heavy chain ( $\beta$ -  
46 MyHC), resulting in an exchange of arginine vs. glycine at position 723 (p.R723G).

47 Tissue samples of interventricular septum, lateral as well as inferior posterior ventricular wall  
48 of the explanted heart were shock frozen in liquid nitrogen immediately after dissection.  
49 mRNA and functional data obtained with cardiomyocytes from the different cardiac regions  
50 of the R723G patient were very similar and therefore the data were combined for further  
51 analysis.

52

### 53 **Controls**

54 Flash-frozen control heart tissue of the left-ventricular free wall and the interventricular  
55 septum was from non-transplanted donor hearts for which no suitable recipient had been  
56 found (n=5, 23–52 years of age, mean age  $41 \pm 11$  years; 1 female, 4 males). The donor heart  
57 tissue samples were obtained from the Sydney Heart Bank, University of Sydney, Australia.  
58 Previously it was shown for control cardiomyocytes that functional parameters of sarcomere  
59 contraction as they are measured here are not age-dependent (Hamdani et al., 2010).

60

### 61 **Frozen tissue samples**

62 Cardiac tissue samples frozen in liquid nitrogen were split into smaller pieces by gently  
63 crushing the tissue with a cooled pestle in a liquid nitrogen-cooled mortar. These frozen  
64 pieces were then used for mRNA quantification and to isolate cardiomyocytes for functional  
65 studies.

66

### 67 **Force measurements of single cardiomyocytes**

68 Cardiomyocytes were mechanically isolated and chemically permeabilized as previously  
69 described (Kraft et al., 2013). From the cardiomyocyte suspension, a single, cylindrically  
70 shaped cardiomyocyte showing striations was selected and attached to a motor (High Speed  
71 Length Controller, Aurora Scientific, Canada) and force transducer with silicone adhesive.  
72 The selection of cardiomyocytes suitable for mechanical measurements followed the same  
73 criteria (cell length, cell width, striation pattern) for the donors and the HCM-patients'  
74 cardiomyocytes. Sarcomere length of the mounted cardiomyocytes was adjusted to  $2.2 \mu\text{m}$ .  
75 Cardiomyocytes with mutation R723G were from inferior/posterior left ventricular wall  
76 (n=10; open red symbols in Figure 1) and from interventricular septum (n=12; filled red  
77 symbols in Figure 1), the respective donor cardiomyocytes were from the left ventricular wall  
78 of four different donors. Due to the small inter-sample variability of the pCa-curves of the  
79 donor cardiomyocytes the data were pooled. Cardiomyocytes with mutation A200V and  
80 respective donor cardiomyocytes were from the interventricular septum.

81

82 Force generation was measured in activating solutions of different  $\text{Ca}^{++}$ -concentrations which  
83 are shown as pCa-values ( $-\log_{10}[\text{Ca}^{++}]$ ), as described previously (Kraft et al., 2013). Values  
84 ranging from relaxing conditions (pCa 9.0) to saturating  $\text{Ca}^{++}$ -concentration (pCa 4.63) were  
85 chosen. Upon transfer of the mounted cardiomyocyte from a trough with relaxing solution to  
86 a trough with an activating solution force started to develop. For cardiomyocytes with  
87 mutation A200V, a protocol as shown in Figure S1 was applied, with several short releases of

88 the cardiomyocyte during the initial phase of  $\text{Ca}^{++}$  activation. This allowed stabilization of the  
89 striation pattern while  $\text{Ca}^{++}$  could equilibrate (Brenner, 1983). For cardiomyocytes with  
90 mutation R723G, the experimental protocol was as shown previously (Kraft et al., 2013). In  
91 all cases, once force had reached a steady state level, a short length-release was applied to  
92 slacken the cardiomyocyte within 1ms by 40% of its initial length. This allowed free  
93 shortening of the cardiomyocyte under zero load and recording of the zero force level. Total  
94 force ( $F_{\text{tot}}$ ) was determined as the difference between steady state force and zero force level.  
95 After several ms of free shortening the cardiomyocyte was set back to its original isometric  
96 length by the motor, and force could redevelop back to the original isometric steady state  
97 level (force redevelopment). Then the cardiomyocyte was rapidly moved back to relaxing  
98 solution. After the cardiomyocyte had fully relaxed, the cardiomyocyte was slackened for 10  
99 sec by a length release (30% of cell length) to determine passive force ( $F_{\text{pass}}$ ). Active force  
100 was calculated as  $F_{\text{act}}=F_{\text{tot}}-F_{\text{pass}}$ . To record a force-pCa-relation, this procedure was repeated  
101 with activating solutions of different concentrations of free  $\text{Ca}^{++}$ -ions. The sequence of  $\text{Ca}^{++}$ -  
102 concentrations was randomized. The time for force redevelopment was adjusted so that for all  
103 activation levels steady state force was reached. At the end of each pCa-series another  
104 maximum activation was carried out to determine the force run down of the respective  
105 cardiomyocyte by comparison this value to the initial maximum force value. For donors and  
106 HCM-patients cardiomyocytes with more than 20% force rundown were excluded from the  
107 analysis.

108  
109 Solutions for R723G-cardiomyocytes were as described previously (Kraft et al., 2013). For  
110 A200V-cardiomyocytes the relaxing solution contained (in mM): 10 imidazole, 2  $\text{MgCl}_2$ , 3  
111 EGTA, 10 CrP, 10 caffeine, 2 MgATP, 110 K-propionate; pCa about 9; the activating  
112 solution contained (in mM): 10 imidazole, 2  $\text{MgCl}_2$ , 3 CaEGTA, 10 CrP, 10 caffeine, 2  
113 MgATP, 110 K-propionate; pCa 4.5. The pH of both solutions was adjusted to 7.1 at 15°C by  
114 adding the appropriate amount of KOH. Chemicals were from Sigma-Aldrich (Steinheim,  
115 Germany). Relaxing and activating solutions were mixed in different proportions to obtain  
116 activating solutions of different pCa values. The proportions required for different pCa-values  
117 were calculated using the program “calcium” (Fohr et al., 1993). To minimize variability  
118 arising from day to day solution mixing, activating solutions with different pCa values were  
119 pre-mixed in larger quantities, divided in small aliquots and kept frozen at -20°C until use.

120 Since previous work showed that PKA-dependent phosphorylation in donor and patient’s  
121 myocardium can be quite different (van der Velden et al., 2003; Kraft et al., 2013), we aimed  
122 to exclude effects of different PKA-dependent phosphorylation on our mechanical  
123 measurements. Therefore, force measurements were performed after a 1hr incubation of the  
124 mounted cardiomyocyte with Protein Kinase A (PKA, Sigma-Aldrich, Steinheim, Germany)  
125 at 20°C to maximize phosphorylation of PKA-dependent sites, particularly of cardiac troponin  
126 I (cTnI). Based on gel electrophoretic analysis at the tissue level such treatment yields  
127 comparable PKA-dependent phosphorylation of donor cardiomyocytes and cardiomyocytes of  
128 the HCM-patients (Kraft et al., 2013).

129 To compare absolute forces generated by the cardiomyocytes, the observed  $F_{\text{act}}$  at saturating  
130  $\text{Ca}^{++}$ -concentration was related to the cross sectional area of the cardiomyocyte. To determine  
131 the cross-sectional area, the width of the mounted cardiomyocyte was measured with the light

132 microscope in the setup (Axiovert 100, Zeiss, Oberkochen, Germany) with a 32x objective  
133 lens. The height was measured by imaging the cardiomyocytes through a small prism placed  
134 parallel to the axis of the mounted cardiomyocyte (20x objective lens) (Belin et al., 2006).  
135 The cross-sectional area was calculated assuming an elliptically shaped cross-section.

136

137 Note that the protocol for force measurements and the solution composition for R723G and  
138 A200V experiments were slightly different, while conditions otherwise (e.g., experimental  
139 temperature, PKA-incubation) were identical. However, the differences of solutions and  
140 protocol had no substantial impact on the force-pCa-curves. This can be seen e.g., from the  
141 highly similar pCa<sub>50</sub> values of donor cardiomyocytes from the two sets of experiments in  
142 Figure 1c and 1d.

143

#### 144 **Quantification of mutant vs. wildtype *MYH7*-mRNA in individual cardiomyocytes**

##### 145 *Isolation of individual cardiomyocytes by laser microdissection*

146 Flash frozen cardiac tissue samples were mounted on the sample plate of a cryomicrotome  
147 (Microm HM 560; Thermo Fisher Scientific, Schwerte, Germany) with OCT and sections of 5  
148 µm thickness were cut from the non-embedded side. The sections were mounted on slides  
149 coated with a PEN-membrane (Zeiss, Oberkochen, Germany) and fluorescently stained for  
150 cadherin. Before staining the sections were fixed in ice-cold 75% ethanol and washed for 10 s  
151 in ice cold PBS. For the staining of intercalated discs, the tissue sections were incubated for 3  
152 min at room temperature with 15 µl of the primary anti-cadherin antibody (Abcam,) diluted  
153 1:10 in PBS with 2mg/ml BSA. The slides were washed twice for 10 s in ice cold PBS. This  
154 was followed by incubation for another 3 min at room temperature with 15 µl of the  
155 secondary anti-rabbit-TRITC antibody (Sigma-Aldrich, Steinheim, Germany), also diluted  
156 1:10 in PBS with 2 mg/ml BSA. This was followed by three washes, 10 s each, with ice cold  
157 PBS. Tissue sections were then dehydrated in ice cold ethanol (75%, 95%, 100%, for 10 sec,  
158 30 sec, and 1 min, respectively).

159 Single cardiomyocytes were isolated by laser microdissection (LMD) with a Zeiss PALM  
160 setup. Cardiomyocytes were identified by fluorescently labeled cadherin in the desmosomes  
161 and the striation pattern in bright field illumination (Figure S2). Individual cardiomyocytes  
162 were marked, laser dissected, and catapulted into 27 µl nuclease free water in the lid of a  
163 PCR-tube. Cardiomyocytes were lysed by one freeze-thaw cycle (freezing in liquid nitrogen  
164 and thawing at room temperature) and subsequent incubation at 75°C for 10 min.

165

##### 166 *Quantitative single cell RT-PCR*

167 The total volume of 27 µl of each lysate from single cardiomyocytes was mixed with 13 µl  
168 reverse transcription reaction mix (1x reaction buffer, 0.125 mM dNTPs each, 0.4 µM *MYH7*  
169 specific primers (Table S1), 1 U/µl RNase inhibitor (RiboSafe, Bioline, Luckenwalde,  
170 Germany), and 5 U/µl reverse transcriptase (Tetro RT, Bioline)). The sample was mixed using  
171 a micromixer for 10 min at room temperature (Boon et al., 2011). For subsequent cDNA-  
172 synthesis samples were split into two aliquots of 20 µl each. Both aliquots were incubated on  
173 the micromixer for 1 h at 42°C.

174 For relative quantification of the *MYH7* alleles in the single cardiomyocytes, a nested PCR  
175 was applied. For the first PCR, the complete cDNA was amplified in PCR reaction mix that

176 contained 1x reaction buffer, 0.5 mM MgCl<sub>2</sub>, 0.2 mM of each dNTP, 0.2 μM of both forward  
177 and reverse nested primers 1 (Table S1), and 0.04 U/μl HotStarTaq (Qiagen, Hilden,  
178 Germany), final volume 100 μl. Initial activation was performed for 15 min at 95°C.  
179 Subsequently, 45 cycles were applied with 95°C for 30 sec, 67°C (R723G) or 60°C (A200V)  
180 for 30 sec, and 72°C for 30 sec. The final elongation was performed at 72°C for 2 min.  
181 For the second, nested PCR, 1 μl of the PCR-product was transferred to the PCR reaction mix  
182 that contained 1x reaction buffer, 0.5 mM MgCl<sub>2</sub>, 0.2 mM of each dNTP, 0.2 μM of both  
183 forward and reverse nested primers 2 (Table S1), and 0.04 U/μl HotStarTaq (Qiagen, Hilden,  
184 Germany) in a final volume of 25 μl. Following an initial activation for 15 min at 95°C, 45  
185 cycles were applied with 95°C for 30 sec, 67°C (R723G) or 62°C (A200V) for 30 sec, and  
186 72°C for 30 sec. The final elongation was performed at 72°C for 2 min. To ensure that during  
187 first and second PCR both, wildtype and mutant mRNA were amplified, as control a defined  
188 50/50 mixture of standard plasmids that encoded for the wildtype and mutated R723G  
189 sequence of the respective PCR amplicons were run in parallel through the same protocol.  
190 To account for possible heteroduplex-formation, a reconditioning PCR was performed  
191 (Thompson et al., 2002). For this 2.5 μl of the second nested PCR were transferred to a final  
192 volume of 25 μl PCR reaction mix identical to the second nested PCR, and the respective  
193 PCR protocol was run for three successive cycles.

194

#### 195 *Allele specific restriction digest*

196 12.5 μl of the reconditioned PCR products were treated with *Mbo*I or 5 U *Hpy*4CHI (both  
197 New England BioLabs, Ipswich, MA, USA) for the mutation R723G or A200V, respectively,  
198 in a final volume of 15 μl in the respective restriction buffer for at least 3 h at 37°C. For  
199 mutation R723G, the digest resulted in a 145 bp band for both alleles, a 125 bp and a 90 bp  
200 fragment for the mutant and the wildtype allele, respectively (Kraft et al., 2016). For mutation  
201 A200V, the digest yielded a 85 bp fragment for both alleles, a 108 bp and 138 bp fragment  
202 specific for the mutant and wildtype mRNA, respectively (Figs. 2A, 2B and S3A).

203

#### 204 *Quantification of allelic expression*

205 *Mbo*I or *Hpy*4CHI-treated PCR products were separated on 3.5% sieving agarose gels stained  
206 with ethidiumbromide (Figure 2A, Figure S3A; for R723G see (Kraft et al., 2016)).  
207 Quantification of mutant vs. wildtype *MYH7*-mRNA was performed as described previously  
208 in detail (Tripathi et al., 2011). In brief, the restriction fragments were analysed  
209 densitometrically using the TotalLab (Newcastle upon Tyne, Great Britain) and Origin  
210 (OriginLab, Northampton, MA, USA) software, yielding the integrated optical density (IOD)  
211 of each band. The IOD was normalized against the number of base pairs to correct for the  
212 concentration of intercalated stain. The fraction of mutant *MYH7*-mRNA was calculated as  
213 the ratio of IOD/bp of the mutation-specific fragment over IOD/bp of the fragment generated  
214 by both mutant and wildtype *MYH7*-mRNA.

215

#### 216 **Control of linearity**

217 For both mutations, we tested the linearity of our quantification procedure as previously  
218 described (Tripathi et al., 2011) using standard plasmids that encoded for the wildtype, the  
219 R723G, or A200V sequence of the respective PCR amplicons. These were mixed in defined

220 ratios (20/80; 40/60; 50/50; 70/30; 90/10) and used as templates for qPCR, reconditioning  
221 PCR and the subsequent allele specific restriction digest. Quantification of the restriction  
222 digest of the standard mixtures revealed that the mixed allelic templates were amplified and  
223 detected in direct proportion to the stoichiometric fraction of each template (Figure S3B,C for  
224 mutation A200V; for mutation R723G cf. Tripathi et al. (Tripathi et al., 2011)). Thus, within  
225 the range of our tested mixtures of standard plasmids we can retrieve the fraction of mutant or  
226 wildtype *MYH7*-mRNA with high accuracy (error <4.4%).

227

### 228 **Quantification of experimental scatter**

229 To determine the experimental scatter of our single-cell quantification method, we performed  
230 parallel quantification of mutant vs. wildtype mRNA from a diluted larger mRNA sample. A  
231 section of R723G septum tissue was lysed and diluted serially and subjected to quantitative  
232 single cell RT-PCR. The integrated optical density of PCR products of these dilutions and of  
233 single cardiomyocytes were determined and normalized to the 300 bp band of the equimolar  
234 standard ladder on each gel (4 µl/lane; Carl Roth, Karlsruhe, Germany). The diluted lysate  
235 with a normalized IOD that was comparable to that of single cardiomyocytes was then  
236 divided into 13 aliquots. These aliquots were subjected to parallel, quantitative single cell RT-  
237 PCR as described for single-cell quantification of mutated and wildtype mRNA, with  
238 subsequent allele specific restriction digest and densitometric quantification (Figure 2D).

239

### 240 **Absolute quantification of the *MYH7*-mRNA copy number in individual cardiomyocytes**

241 Standard-RNA was generated by in vitro transcription using *MYH7*-cDNA (clone  
242 IRCMp5012C0225D, Source BioScience, Berlin, Germany) as a template for the T7-  
243 MegaScript Kit (Thermo Fisher Scientific, Schwerte, Germany) according to the suppliers'  
244 instructions. Standard-RNA was isolated as described above and the concentration was  
245 determined using a NanoDrop device (PeqLab, Erlangen, Germany).

246 For the absolute quantification of *MYH7*-mRNA in individual cardiomyocytes, cells were  
247 microdissected from R723G cardiac tissue slices (5µm thickness) as described above and  
248 lysed. The single-cell lysate and serial dilutions of the standard-RNA of  $1 \times 10^6$ ,  $1 \times 10^5$ ,  $1 \times 10^4$ ,  
249  $1 \times 10^3$ , and  $1 \times 10^2$  copies were reverse transcribed in parallel in a final volume of 40 µl reverse  
250 transcription reaction mix (1x reaction buffer, 0.125 mM dNTPs each, 0.4 µM primer  
251 Exon16\_rev (Table 1)), 1 U/µl RNase inhibitor (RiboSafe, Bioline, Luckenwalde, Germany),  
252 and 5 U/µl reverse transcriptase (Tetro RT, Bioline). The cDNA was then subjected to a pre-  
253 amplification PCR using 1x TaqMan Master Mix (Applied Biosystems, Foster City, CA,  
254 USA), 0.4 µM of each forward and reverse real-time PCR primer (Table S1) in a final volume  
255 of 100 µl. PCR was performed after initial denaturation at 95°C for 10 min, followed by 40  
256 cycles of 95°C for 45 sec and 60°C for 45 sec. Real-time PCR was performed in a final  
257 volume of 20 µl. 1 µl of pre-amplified PCR product was transferred to 1x TaqMan Master  
258 Mix, 0.4 µM of each, real-time PCR probe and forward and reverse real-time PCR primer,  
259 respectively (Table S1). After initial denaturation at 95°C for 10 min, 40 cycles of 95°C for  
260 45 sec and 60°C for 45 sec were applied using an ABI 7500 Fast Real-time PCR setup  
261 (Applied Biosystems, Foster City, CA, USA). The copy number per cardiomyocyte was  
262 calculated from linear regression analysis of the standard RNA.

263

264 **Quantification of the fraction of mutated protein in tissue samples with  $\beta$ -MyHC-**  
265 **mutation A200V**

266 Quantification of mutated and wildtype protein in myocardial tissue with mutation A200V  
267 was performed according to the same mass-spectrometry approach as previously published  
268 for other  $\beta$ -MyHC-mutations (Becker et al., 2007). Briefly, sarcomere-bound myosin was  
269 extracted from fragments of a myectomy sample with mutation A200V. The myosin was  
270 subjected to a trypsin digest with an enzyme to myosin ratio of 1:27. Myosin was digested for  
271 2x24 hrs at 37°C on a shaker, with adding the same amount of trypsin after the first 24 hrs.  
272 The buffer for digestion was 40mM ammonium bicarbonate (Sigma Aldrich, Steinheim,  
273 Germany), pH 8.0 in 10% acetonitrile (ACN; LiChrosolv/Merck, Darmstadt, Germany) in  
274 90% H<sub>2</sub>O (Milli-Q Synthesis A10, Merck, Darmstadt, Germany). Trypsin was from Promega  
275 Corporation, Madison, USA (Mass Spectrometry Grade). After digestion, the myosin peptide  
276 mix was lyophilized and redissolved in 20% ACN, 0.1% TFA (trifluoroacetic acid; J.T.  
277 Baker, Griesheim, Germany), and 1% DMSO (Sigma-Aldrich, Steinheim, Germany) and  
278 stored at minus 20°C until analysis.

279 For quantification of mutated and wildtype  $\beta$ -MyHC, the 14 amino acid peptide generated by  
280 the trypsin digest was used that contained the mutation site (at position 10) with an alanine or  
281 valine in the wildtype and mutant peptide, respectively (Table S2). As internal quantification  
282 standards equal quantities of synthetic stable-isotope-labeled forms of the mutant and  
283 wildtype 14 amino acid peptide (Table S2), respectively, were added before myosin was  
284 digested. These standard peptides were synthesized with a purity of more than 98% and a  
285 peptide content of 89% (verified by quantitative amino acid analysis; Coring System  
286 Diagnostix GmbH, Gernsheim, Germany). The peptides were dissolved in H<sub>2</sub>O (Milli-Q  
287 Synthesis A10, Merck, Darmstadt, Germany) with (v/v) 35% ACN, 0.1% TFA and 10%  
288 DMSO. DMSO was added to ensure a complete dissolution of the lyophilized isotope-labeled  
289 peptides. In further dilution steps DMSO was reduced to a concentration of less than 5%.

290 The peptide mix of the myosin digest was directly applied to a HPLC-system (Agilent 1100  
291 Capillary Pump System; Agilent Technologies, Waldbronn, Germany) connected to an  
292 electrospray mass spectrometer (Bruker Esquire3000 plus; Leipzig, Germany); i.e., different  
293 from our previously published method (Becker et al., 2007) the peptide mix was not pre-  
294 fractionated. Injection volume of the peptide mix including the internal standard peptides was  
295 1 $\mu$ l. The separation column (Agilent Zorbax 300 SB-C18, 5  $\mu$ m, 150 x 0.5 mm) was run with  
296 a flow rate of 5  $\mu$ L/min. Peptides were separated with an increasing ACN-gradient starting at  
297 5% ACN with 0.1% TFA in H<sub>2</sub>O and ending at 80% ACN with 0.1% TFA. Quantification of  
298 the target peptide ions was based on extracted ion chromatograms (Figure S4) with a width of  
299  $m/z \pm 0.5$  using the software Bruker Daltonics QuantAnalysis 1.6.

300

301 **Fluorescence in situ hybridization (FISH) for visualization of active transcription sites**  
302 **(*MYH7*-pre-mRNA) and cytoplasmic *MYH7*-mRNA**

303 To visualize active transcription sites by fluorescence in situ hybridization (FISH) we labelled  
304 pre-mRNA by two Stellaris® probe sets (BioSearch Technologies, Petaluma, CA, USA). One  
305 set contained 48 of 20-mer oligonucleotides designed to label intronic sequences of *MYH7*,  
306 the other contained 48 of 20-mer oligonucleotides to label exonic sequences. Of the first set

307 each oligonucleotide was labelled with one Quasar 670 fluorophore, of the second set each  
308 oligonucleotide was labelled with one Quasar 570 fluorophore.  
309 Our hybridization procedure followed the protocols of BioSearch Technologies (Petaluma,  
310 CA) and of (Lyubimova et al., 2013) with some modifications. First, frozen tissue samples  
311 were pre-fixed in 4% paraformaldehyde (PFA) at 4°C for 5-6h. Next, the samples were  
312 completely embedded in Tissue-Tek O.C.T. (Sakura Finetek Europe, Leiden, NL) on dry ice  
313 and stored in liquid nitrogen until cryo-sectioning. The cryo-sections (5µm or 16µm thick)  
314 were attached to HistoBond<sup>®</sup> adhesive microscope slides (Mariesfeld GmbH & Co.KG,  
315 Lauda-Königshofen, Germany) and fixed for 20 min with 4% PFA (in PBS) at room  
316 temperature. Subsequently the sections were washed three times with 1x PBS (w/o Mg<sup>2+</sup>,  
317 Ca<sup>2+</sup>). Then the tissue sections were permeabilized for 1.5h in 70% EtOH at 4°C and  
318 incubated in wash buffer (10% formamide, 2x saline-sodium citrate (SSC) in nuclease-free  
319 water) for 2-5min. This was followed by the over-night hybridization. For hybridization,  
320 tissue sections were surrounded by a Teflon ring attached to the cover slips by grease to  
321 minimize the necessary volume of hybridization buffer. The hybridization buffer contained  
322 125nM of each probe set (Lyubimova et al., 2013). The hybridization was done in a sealed  
323 humidified chamber at 37°C with a 13mm cover slip on top of the buffer-filled Teflon ring to  
324 prevent evaporation. After hybridization, samples were washed twice for 30min with wash  
325 buffer (see above) at 37°C. In the second wash DAPI was added at a concentration of  
326 40ng/mL. Next, the samples were incubated in 2xSSC for 2-5min at RT. After removing  
327 teflon ring and vacuum grease, 13µl GLOX anti-fade buffer was added before imaging  
328 (Lyubimova et al., 2013).  
329 Samples were imaged with an Olympus IX83 fluorescence microscope with a 60x oil  
330 objective (ApoN TIRFMN.A. 1.49, Olympus, Tokyo, Japan) and a metal halide light source.  
331 Images were recorded with a cooled CCD camera (Orca-R<sup>2</sup>, Hamamatsu, Photonics, Japan).  
332 Three-dimensional z-stacks were recorded with motorized shutter and z-stage using filter sets  
333 for DAPI (Chroma U-F4900, Chroma Technology Corp, Bellows Falls VT, USA), GFP  
334 (Chroma U-F49002), Cy3 (Chroma U-F49004) and Cy5 (Chroma U-F49006). Exposure times  
335 for thick sections (16µm) were 40ms for DAPI, 350ms for GFP and Quasar 570, and 1s for  
336 Quasar 670. For thin sections (5µm) we used 40ms for DAPI, 400ms for GFP and Quasar  
337 570, and 1s for Quasar 670. Adjacent images in z-stacks were separated by 0.3µm.  
338 The number of active transcription sites, i.e., spots with double fluorescence of both probe  
339 sets inside nuclei, were counted manually using cellSens Dimension (version 1.13, Olympus,  
340 Tokyo, Japan).

341

### 342 **Estimate of ploidy of nuclei of cardiomyocytes**

343 Cardiomyocytes can be polyploid, in normal and in hypertrophied myocardium (Brodsky et  
344 al., 1994; Herget et al., 1997). It was shown that the volume of DAPI-stained nuclei is  
345 proportional to their ploidy (Bergmann et al., 2011; Bahar Halpern et al., 2015). To determine  
346 the ploidy of nuclei in the R723G-sample we determined the largest cross-sectional area of  
347 DAPI-stained nuclei in z-stacks recorded from frozen tissue sections of 16µm thickness. The  
348 largest cross sections of 638 nuclei located inside cardiomyocytes and of 774 nuclei located  
349 outside cardiomyocytes were determined using Olympus imaging software (cellSens  
350 Dimension version 1.13, Olympus, Tokyo, Japan). The nuclei outside cardiomyocytes, e.g., of



351 cells in connective tissue, were taken as the reference for diploid (2n) nuclei. An estimate of  
352 the volume of the nuclei was obtained by calculating the 3/2 power of the largest cross-  
353 sectional area. This way of volume estimate was performed since not all nuclei were fully  
354 enclosed even in 16µm sections. From the volume distribution of the 774 nuclei outside  
355 cardiomyocytes we estimated the mean volume of 2n nuclei by maximum likelihood fitting of  
356 their volume distribution with a Gaussian function. The thus obtained mean volume of 150  
357 µm<sup>3</sup> was taken as the initial estimate for maximum likelihood fitting of the volume  
358 distribution of the 638 nuclei inside cardiomyocytes. Gaussian functions with means that were  
359 multiples of the 2n volume were used, corresponding to different ploidy levels (2n, 4n, 8n,  
360 16n, and 32n). The SD of the Gaussians was set proportional to the mean volume, i.e.,  
361 proportional to ploidy, using the SD obtained from the fitting of the 774 nuclei outside  
362 cardiomyocytes (2n). As a result we found for the R723G cardiac tissue 50.4% diploid, 17.6%  
363 tetraploid, 7.1% octoploid, and 11.3% 16-ploid and 13.5% 32-ploid cells. These values were  
364 used for the model calculations described below. For comparison, in donor myocardial tissue  
365 19.3% of the cardiomyocytes were diploid, 45.4% tetraploid, 23.1% octoploid, 11.3% 16-  
366 ploid and 0.9% 32-ploid, which corresponds to similar values for normal heart tissue in the  
367 literature (Herget et al., 1997).

368

### 369 **Modelling of cell-to-cell variation in mutant mRNA and mutant protein by burst-like,** 370 **independent, stochastic transcription of the mutant and wildtype allele**

371 The model calculations were based on stochastic, burst-like transcription (Raj et al., 2006).  
372 Previously, modelling of burst-like transcription was done to account for large variation in  
373 mRNA or protein expression in individual cells of a genetically homogenous cell population  
374 (Raj et al., 2006). Different from this previous modelling, here we distinguish transcription  
375 and translation of the two alleles, mutant and wildtype, in terms of mutant vs. wildtype  
376 *MYH7*-mRNA as well as mutant vs. wildtype β-MyHC-protein in individual cardiomyocytes.  
377 We can compare the model predictions with the *in vivo* situation since we have experimental  
378 information about mutant vs. wildtype transcript levels and (indirectly via function) about  
379 mutant vs. wildtype protein of the two β-MyHC (*MYH7*) alleles from our study on  
380 heterozygous point mutations in the *MYH7* gene, e.g., mutation R723G.

381 We assume stochastic, independent, burst-like transcription of the two alleles of the *MYH7*  
382 gene. To model independent, burst-like transcription and translation of the two alleles, we set  
383 up the differential equations for both alleles with identical kinetic parameters (Table S3).  
384 Only the degradation rate of mutant mRNA with the R723G mutation was set to half of that  
385 of wildtype *MYH7*-mRNA to account for the approximately 2:1 average fraction of  
386 mutant:wildtype mRNA and protein in tissue samples of R723G patients (Figure S8a  
387 (Tripathi et al., 2011)). This is based on preliminary evidence that mutation R723G affects the  
388 mRNA-stability (own, unpublished observation).

389 The relevant reactions were (i) the stochastic opening and closing of the transcription sites  
390 described by the rate constants  $k_{act}$  and  $k_{inact}$ , (ii) the transcription process to pre-mRNA  
391 with the rate constant  $k_{plus\_pre-mRNA}$ , (iii) generation of mRNA by splicing (rate constant  
392  $k_{plus\_mRNA}$ ) and mRNA degradation with the rate constant ( $k_{minus\_mRNA}$ ), and (iv)  
393 the translation into protein and protein degradation with the rate constants for protein  
394 synthesis per mRNA molecule and protein degradation ( $k_{plus\_Protein}$ ,  $k_{minus\_Protein}$ ,

395 respectively). Thus, each iteration run consisted of solving the following four equations  
396 sequentially and for each of the two alleles separately:

```
397  
398 DNA[i] <- (1-DNA[i-1])*Rbin_akt[i-1]+DNA[i-1]*(1-Rbin_inakt[i-1])  
399 premRNA[i] <- premRNA[i-1] + DNA[i]*k_plus_premRNA - premRNA[i-1]*k_plus_mRNA  
400 mRNA[i] <- mRNA[i-1] + premRNA[i]*k_plus_mRNA - mRNA[i-1]*k_minus_mRNA  
401 Protein[i] <- Protein[i-1] + mRNA[i]*k_plus_Protein - Protein[i-1]*k_minus_Protein
```

402

403 Thereby, Rbin\_akt and Rbin\_inakt are vectors consisting of zeroes and ones with the  
404 probability for ones being  $k_{act}$  and  $k_{inact}$ , respectively. DNA is a vector representing the  
405 open (1) or closed (0) state of the transcription site at each iteration point [i].

406

407 DNA produces pre-mRNA with a specified synthesis rate ( $k_{plus\_pre-mRNA}$ ) and pre-  
408 mRNA is directly transformed into mRNA by splicing. Accordingly there is no degradation of  
409 pre-mRNA, but mRNA is produced with the same rate as pre-mRNA is diminished  
410 ( $pre-mRNA[i] * k_{plus\_mRNA}$ ).

411 The model was set up to accommodate different proportions of di-, tetra-, octo- and higher-  
412 ploid nuclei in the following way: The user defined number of iterations was split in five parts  
413 according to the proportion of di-, tetra-, octo-, 16- and 32-ploid nuclei. For the first of the  
414 five parts the simulation was done with a diploid model, for the second part with a tetraploid  
415 model, for the third part with an octoploid model, and so on. Thereby, for the diploid model  
416 only one simulation run was performed each for the mutant and the wildtype allele. For the  
417 tetraploid model two simulation runs were performed simultaneously each for the mutant and  
418 wildtype allele. For the octoploid model four simulation runs were performed simultaneously  
419 each for the mutant and wildtype allele, and so on. Time courses of on/off switching of  
420 transcription sites, mutant and wildtype pre-mRNA, mutant and wildtype mRNA, fraction of  
421 mutant mRNA, and of mutant protein were plotted individually for di-, tetra-, octo-, 16- and  
422 32-ploid cells (cf. Figure S8 showing time courses for di- and tetraploid cell). Thus, frequency  
423 distributions of the simulated variables (mutant and wildtype pre-mRNA counts, mutant and  
424 wildtype mRNA counts, fraction of mutant mRNA and fraction of mutant protein) for all five  
425 parts put together are representative for the properties of a multitude of cells.

426

427 To be able to compare the model outcome to experimentally observed active transcription  
428 sites in nuclei (by spots with fluorescently labelled pre-mRNA), for every iteration run the  
429 existence of one or more pre-mRNA molecules was determined and counted. This was done  
430 for both alleles in the diploid proportion, four alleles in the tetraploid proportion, eight alleles  
431 in the octoploid proportion, etc. The resulting distribution of the pre-mRNA count (0, 1, 2, 3,  
432 etc.) was compared to the measured distribution of the active transcription site count.

433

#### 434 *Constraints for the model*

435 (i) The first constraint was the experimentally observed cell-to-cell variation in mutant mRNA  
436 for R723G (mean and width of distribution, Figure 2), (ii) the second constraint was cell-to-  
437 cell functional variation, e.g., of the  $pCa_{50}$  value for R723G (mean and width of distribution,  
438 Figure 1), as indirect evidence for cell-to-cell variation of mutant protein. (iii) The modelling

439 had to account for the median and distribution of the *MYH7*-mRNA copy number per  
440 cardiomyocyte (mutant plus wildtype) seen with absolute quantification (Figure 3). (iv) The  
441 modelling had to account for the observed fraction of nuclei without active transcription sites  
442 (27%) (Figure 3A). (v) The modelling was further constrained by the total number of  $\beta$ -  
443 MyHC-protein molecules expected for cardiomyocytes. This was estimated for a  $5 \times 10 \times 50$   
444  $\mu\text{m}^3$  cardiomyocyte from the known number of myosin molecules per myosin filament, the  
445 myosin filament packing revealed by X-ray diffraction, a sarcomere length of  $2.2 \mu\text{m}$ , and  
446 considering that half of the cell volume is occupied by myofibrils in tissue samples of HCM-  
447 patients (Kraft et al., 2013). This estimate yielded a total number of about  $2 \times 10^8$  myosin  
448 molecules per cardiomyocyte. (vi) A further constraint was the estimated mRNA degradation  
449 rate ( $k_{\text{minus\_mRNA}}$ ) for the *MYH7*-mRNA in differentiating mouse embryonic stem cells  
450 (Sharova et al., 2009) and the degradation rate of mRNA of various myosins in mouse  
451 fibroblasts (Schwanhausser et al., 2011) in the order of 0.06-0.09/h. (vii) The transcription  
452 rate constant ( $k_{\text{plus\_pre-mRNA}}$ ) was constrained by the observed total number of mRNA  
453 copies per cardiomyocyte (median = 589; Figure 3). (viii) The rate constant for protein  
454 synthesis per *MYH7*-mRNA molecule could be estimated from the fractional synthesis rate of  
455  $\beta$ -MyHC in rabbits (Everett et al., 1983) and the median *MYH7*-mRNA copy number per  
456 cardiomyocyte (Figure 3), yielding a rate constant for translation around 2400 protein  
457 molecules per mRNA molecule per hour. (ix) The order of magnitude for the degradation rate  
458 for  $\beta$ -MyHC-protein was derived from the half-life measured for myosins in mouse  
459 fibroblasts, about 0.012/h (Schwanhausser et al., 2011). The only adjustable parameters in our  
460 modelling were the activation/inactivation of transcription of the two alleles ( $k_{\text{act}}$ ,  $k_{\text{inact}}$ )  
461 and the splicing rate constant from pre-mRNA to mRNA ( $k_{\text{plus\_mRNA}}$ ).

462

### 463 *Results from modelling*

464 The rate constants are shown in Table S3. Figure S8 shows a time-period of 80 days of a  
465 predicted time course of different model output variables for an individual diploid and  
466 individual tetraploid cardiomyocyte, each heterozygous for  $\beta$ -MyHC-mutation R723G. The  
467 on/off-state of transcription of the two alleles, the copy numbers of mutant and wildtype  
468 *MYH7*- pre-mRNA and -mRNA molecules, the fraction of mutant *MYH7*-mRNA, as well as  
469 the fraction of mutant  $\beta$ -MyHC are illustrated.

470 To account for our observed cell-to-cell variation in mutant *MYH7*-mRNA, including  
471 cardiomyocytes with essentially pure mutant or pure wildtype *MYH7*-mRNA (cf. Figure 2c),  
472 qualitatively the pauses between transcription bursts, at least once in a while, have to be long  
473 enough for substantial decay of mRNA before the next burst (Figure S8). As a consequence,  
474 at the moment of freezing the tissue sample, in some of the cardiomyocytes mRNA is present  
475 only from one allele, the wildtype or the mutant. Yet, because of the longer life time of the  
476 protein compared to the mRNA (Table S3), the resulting bursts of mRNA are smoothed out at  
477 the protein level to a certain extent (Figure S8), depending on the lifetime of the related  
478 protein relative to the lifetime of mRNA (see also Raj et al., 2006).

479 To be able to directly compare the results of 35 individual cardiomyocytes flash frozen and  
480 microdissected from myocardial tissue to the outcome of the simulation (fractions of mutant  
481 *MYH7*-mRNA and mutant  $\beta$ -MyHC protein), we randomly picked 35 points of a very long  
482 (10,000,000 time points) simulation run (see *Electronic Supplementary Material*). A large

483 separation between the randomly picked points was used to assure 35 uncorrelated,  
484 independent points, just like in individual cardiomyocytes at the time of freezing of the  
485 myocardial tissue. The predicted distribution of the fraction of mutant *MYH7*-mRNA and  $\beta$ -  
486 MyHC-protein among 35 individual model-cardiomyocytes is shown in Figs. 4d and 4e. The  
487 mean fraction of mutant *MYH7*-mRNA (Figure 4d), as well as the 95% range of the 35 time  
488 points were calculated in logit space.

489 It should be noted that in order to account for the various experimental results (7 parameters  
490 of constraints i-v), adjustment of  $k_{act}$  and  $k_{inact}$  of the transcriptions sites and of the  
491 splicing rate  $k_{plus\_mRNA}$  was sufficient to fit the experimental results, even though the rate  
492 constants taken from the literature were from different cell types and mostly not from  
493 cardiomyocytes. Figure S8 demonstrates that with independent, stochastic, burst-like  
494 transcription a cardiomyocyte can change, over an extended time period, from a  
495 cardiomyocyte with high expression of mutant  $\beta$ -MyHC to a cardiomyocyte expressing more  
496 wildtype  $\beta$ -MyHC and vice versa (Figure S8, bottom trace).

497  
498 To estimate the expected effect of the fraction of mutant  $\beta$ -MyHC (protein) on the  $pCa_{50}$  we  
499 assumed (a) as a first approximation a linear decrease in  $pCa_{50}$  with increasing mutant  $\beta$ -  
500 MyHC-protein, (b) that the mean  $pCa_{50}$  of the controls (5.53) represents the  $pCa_{50}$  for pure  
501 wildtype cardiomyocytes (fraction of mutant protein = 0) and (c) that a  $pCa_{50}$  of 5.38, the  
502 mean value of all measured cardiomyocytes of the R723G patient, is the  $pCa_{50}$  of a mean  
503 fraction of mutant protein of 0.68, i.e., the mean fraction of mutant protein determined for the  
504 R723G patients in tissue samples (Tripathi et al., 2011). The dash-dotted line in Figure 4F is  
505 the mean  $pCa_{50}$  (5.38), the dashed lines represent the range within which 95% of all modelled  
506 data points are located (mean  $\pm$  1.96 SD). The linear relationship between  $pCa_{50}$  and the  
507 fraction of mutant  $\beta$ -MyHC-protein is an assumption which could not be tested  
508 experimentally. However, the results from the modelling of  $pCa_{50}$  of the individual  
509 cardiomyocytes (Figure 4F) are very similar to the data of the experiments (Figure 1C),  
510 suggesting that the relationship maybe close to linear.

511 Note that for comparison with experimental data (Figs. 1 and 2) we have to consider the  
512 variance in the experimental data originating from experimental error that is not included in  
513 the model-response. Total variance in  $pCa_{50}$  of cardiomyocytes from the R723G patient  
514 originates from variance due to experimental scatter (represented by the variance in  $pCa_{50}$  of  
515 control cardiomyocytes) plus additional variance from intrinsic variation among individual  
516 R723G cardiomyocytes (due to different expression of mutant  $\beta$ -MyHC-protein). Since both  
517 types of variance are not expected to be dependent, total variance in  $pCa_{50}$  of the R723G  
518 cardiomyocytes ( $SD_{tot}^2$ ) equals intrinsic variance ( $SD_{intrinsic}^2$ ) plus variance from experimental  
519 scatter which is equal to the variance in  $pCa_{50}$  of control cardiomyocytes ( $SD_{control}^2$ ) with no  
520 intrinsic variance (control cardiomyocytes express no mutant  $\beta$ -MyHC-protein). Thus,  
521  $SD_{intrinsic}^2 = SD_{tot}^2 - SD_{control}^2$ . In Figure 4F, the dotted lines include experimental scatter, i.e.,  
522 represent the mean<sub>experiment</sub>  $\pm$  1.96  $SD_{tot}$  and can be compared to experimental data in Figure  
523 1C, upper panel.

524

525 Also, for the fraction of mutant *MYH7*-mRNA the mean and distribution predicted by the  
526 modelling (dash-dot and dashed lines in Figure 4d) is very similar to the range seen

527 experimentally (dash-dot and dashed lines in Figure 2c). Thus, overall, as shown in Figs. 4  
528 and S8, stochastic, independent burst-like transcription of mutant and wildtype alleles can  
529 quite well account for all aspects of cell-to-cell variation in mutant mRNA and function, using  
530 known transcription and degradation rates of *MYH7*-mRNA as well as rates of myosin protein  
531 turnover. In other words, the modelling shows that the observed large cell-to-cell variation in  
532 mutant *MYH7*-mRNA and the large cell-to-cell functional variation among cardiomyocytes  
533 from HCM-patients can directly result from independent, stochastic, burst-like transcription  
534 of the two *MYH7* alleles, mutant and wildtype.

535

### 536 **Statistical Analysis**

537 Data analysis and statistics were performed using Excel, Origin, and R (R, 2013). The data  
538 are presented as mean  $\pm$  SD or as mean  $\pm$  1.96 SD which represents the range within which  
539 95% of data points are expected (see below). Mean values, SDs and p-values are given in the  
540 main text or figure legends.

541

#### 542 *Fitting of Hill equation*

543 For each isolated cardiomyocyte, active forces generated at different  $\text{Ca}^{++}$ -concentrations  
544 (pCa-values) were normalized to the maximum force at saturating  $\text{Ca}^{++}$ -concentration (pCa  
545 4.5). The resulting force-pCa relation follows a sigmoidal course. To characterize the  
546 sensitivity for free  $\text{Ca}^{++}$ -ions ( $\text{Ca}^{++}$ -sensitivity), the Hill function was fitted to the observed  
547 force-pCa relation and  $\text{Ca}^{++}$ -sensitivity was defined as the negative decimal logarithm of the  
548  $\text{Ca}^{++}$  concentration at 50% force (pCa<sub>50</sub> value). Fitting was performed using least-squares  
549 regression. The goodness of each fit was expressed in the corresponding coefficient of  
550 determination ( $R^2$ ).

551

#### 552 *Mean values, variances, 95% prediction interval and Shapiro-Wilk test for normal 553 distribution of normalized data*

554 Normalized forces at partial activation (Figure 1) and the fraction of mutant mRNA of  
555 individual cardiomyocytes (Figure 2c, e) do not have normal data distributions. This is  
556 because their values are limited to the interval between 0 and 1 and our data include values  
557 near 0 and 1. We therefore applied the logit transformation as an appropriate scale  
558 transformation for statistics (Ashton, 1972) with

$$559 \quad \text{logit}(p) = \log(p/(1-p))$$

$$560 \quad \text{and } 0 < p < 1.$$

561 After logit transformation all samples of normalized forces at partial activation and of the  
562 fraction of mutant mRNA showed normal data distribution according to the Shapiro-Wilk  
563 test.

564

565 The 95% prediction interval is the interval in which 95% of all measured values are expected.  
566 Presuming normal distribution, 95% of all values are within the range from mean plus 1.96  
567 standard deviations to mean minus 1.96 standard deviations. For parameters transformed into  
568 logit space, mean values and 95% prediction interval were calculated in the logit space. For  
569 purposes of illustration and comparison lower and upper boundaries of this interval (e.g.,

570 dashed lines in Figure 1, Figure 2) as well as the mean (dash-dotted lines) were then back-  
571 transformed into linear space using the inverse logit transformation:

572 
$$p = 1/(1+\exp(-\text{logit}(p))).$$

573

574 *t-test*

575 After affirming normal distribution with the Shapiro-Wilk test, two-sample Student's t-tests  
576 were performed to determine whether the means of two populations were significantly  
577 different. For statistical comparison of means and variances of forces at partial activation and  
578 of pCa<sub>50</sub>-values for cardiomyocytes from control-individuals vs. two R723G-patients or  
579 control cardiomyocytes vs. one A200V-patient, respectively, we put the cardiomyocytes from  
580 control-individuals in one group (Figure 1), assuming that the measurable variation between  
581 the control-individuals is solely due to experimental error. The cardiomyocytes from several  
582 controls showed a smaller variance in the measured parameters than the patient  
583 cardiomyocytes (both R723G and A200V). For the fraction of mutant mRNA, data were first  
584 logit-transformed. For p<0.05 significance was assumed.

585

586 *F-test*

587 Equality of variances was examined by the F-test after affirming normality with the Shapiro-  
588 Wilk test. For the fraction of mutant mRNA, the F-test was performed in logit space. For  
589 p<0.05 significance was assumed.

590

591

592

593  
594  
595  
596  
597  
598  
599

## 2 Supplementary Figures and Tables

### 2.1 Supplementary Tables

**Table S1. Primers for PCR amplification.**

| Primer               | Sequence                                                    |
|----------------------|-------------------------------------------------------------|
| A200V RT             | 5'-GCCTTGCCTTTGCCCTTCTCA-3'                                 |
| A200V F1             | 5'-ATCACCGGAGAATCCGGAGCA-3'                                 |
| A200V R1             | 5'-TCCAGAAGATAGGTCTCTATGTCTG-3'                             |
| A200V F2             | 5'-AGGGTCATCCAGTACTTTGCTGTTATTAC-3'                         |
| A200V R2             | 5'-ATGTCTGCAGATGCCAACTTTCCT-3'                              |
| R723G F1             | 5'-GTGCTGGAGGGCATCCGCATCT-3'                                |
| R723G R1             | 5'-CTTTTTGTACTCCATTCTGGCGAGCACA-3                           |
| R723G F2             | 5'-<br>CCAACCGCATCCTCTACGGGGACTTCCGGCAGAGGGAT-<br>3''       |
| R723G R2             | 5'-CCATTCTGGCGAGCACACCT-3'                                  |
|                      |                                                             |
| MYH7-Real-Time RT    | 5'-CTTTGCCCTTCTCAATAGGCGCATCAG-3'                           |
| MYH7-Real-Time F     | 5'-AACATCATTGGCTGGCTGCAGAA-3'                               |
| MYH7-Real-Time R     | 5'-CATAGTTGGCAAACAGGGTGCT-3'                                |
| MYH7-Real-Time probe | 5'-6-FAM-<br>TCAATGAGACTGTCGTGGGCTTGTATCAGAAGT-<br>TAMRA-3' |

600  
601  
602  
603

604

605 **Table S2. Mutant and wildtype peptides for  $\beta$ -MyHC-protein quantification in**  
606 **myocardial tissue with mutation A200V.**

607

608 Table shows sequence and molecular mass of native wildtype and mutant peptides after  
609 trypsin-digest, as well as the  $m/z$  ratio of the 2-fold positively charged species of both  
610 wildtype and stable-isotope-labeled internal standard peptides. The amino acid exchange of  
611 alanine vs. valine is indicated by bold letters.

612

|                     | <b>Sequence and target peptide ions<br/>[M + 2H<sup>+</sup>] for quantification</b>       | <b>Deconvoluted monoisotopic<br/>mass [Da] of native peptides</b> |
|---------------------|-------------------------------------------------------------------------------------------|-------------------------------------------------------------------|
| Wildtype<br>peptide | VIQYF*AVIA <b>A</b> IGDR<br>native ion: $m/z$ 768.43<br>isotope-labeled ion: $m/z$ 773.43 | 1534.86                                                           |
| Mutant<br>peptide   | VIQYF*AVIA <b>V</b> IGDR<br>native ion: $m/z$ 782.44<br>isotope-labeled ion: $m/z$ 787.44 | 1562.89                                                           |

613 \* indicates the phenylalanine (F) which in the internal standard peptides was replaced by an  
614 isotopically enriched phenylalanine (<sup>13</sup>C, <sup>15</sup>N).

615



616  
617  
618

**Table S3. Rate constants used in the model calculations.**

|                                                      |                                   |
|------------------------------------------------------|-----------------------------------|
| activation of transcription (k_act)                  | 0.018 /h <sup>#</sup>             |
| inactivation of transcription (k_inact)              | 0.72 /h <sup>#</sup>              |
| synthesis of mutant pre-mRNA (k_plus_pre-mRNA_mut)   | 1800 mRNA/h <sup>†</sup>          |
| synthesis of wildtype pre-mRNA (k_plus_pre-mRNA_wt)  | 1800 mRNA/h <sup>†</sup>          |
| generation of mutant mRNA (k_plus_mRNA_mut)          | 0.3 /h <sup>#</sup>               |
| generation of wildtype mRNA (k_plus_mRNA_wt)         | 0.3 /h <sup>#</sup>               |
| degradation of mutant mRNA (k_minus_mRNA_mut)        | 0.06 /h <sup>‡</sup>              |
| degradation of wildtype mRNA (k_minus_mRNA_wt)       | 0.12 /h <sup>‡</sup>              |
| synthesis of mutant protein (k_plus_Protein_mut)     | 2400 protein/mRNA /h <sup>§</sup> |
| synthesis of wildtype protein (k_plus_Protein_wt)    | 2400 protein/mRNA /h <sup>§</sup> |
| degradation of mutant protein (k_minus_Protein_mut)  | 0.012 /h <sup>  </sup>            |
| degradation of wildtype protein (k_minus_Protein_wt) | 0.012 /h <sup>  </sup>            |

619  
620  
621  
622  
623  
624  
625  
626  
627  
628  
629

<sup>#</sup> Best fit from modelling

<sup>†</sup> k\_plus\_pre\_mRNA = mRNA molecules per cell (median=589; Figure 3) \* k\_minus\_mRNA (mean=0.064/h) \* k\_inact/k\_act (40)

<sup>‡</sup> (Sharova et al., 2009; Schwanhausser et al., 2011)

<sup>§</sup> (Everett et al., 1983)

<sup>||</sup> (Schwanhausser et al., 2011)

630 **2.2 Supplemental Figures**

631

632

633

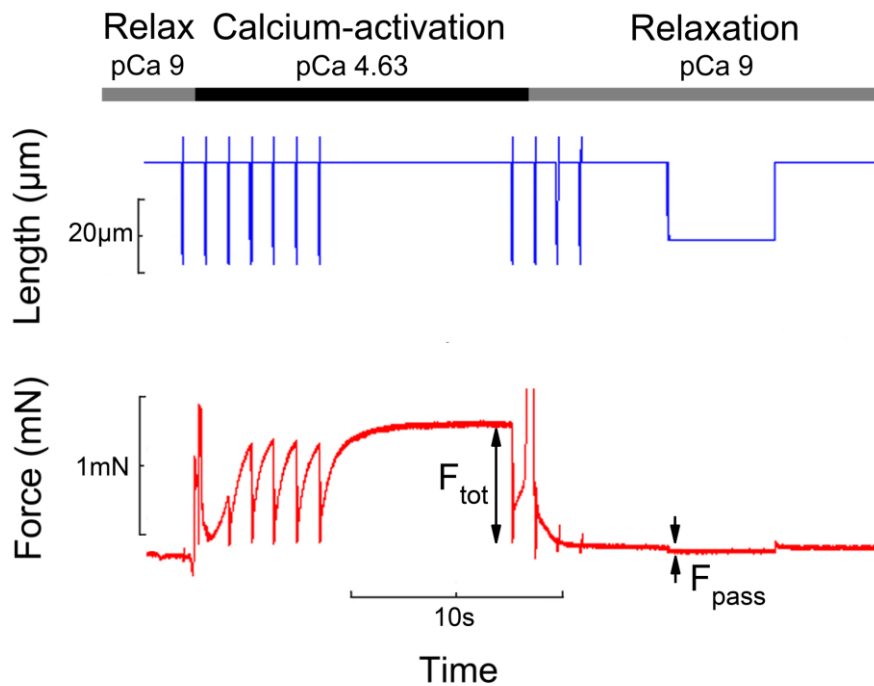

634

635 **Figure S1**

636 *Force measurements of single, chemically permeabilized cardiomyocytes.*

637 Original length and force record showing the experimental protocol as it was used for single  
638 cardiomyocytes with mutation A200V. After moving the cardiomyocyte from relaxing  
639 solution to  $\text{Ca}^{++}$ -activation, initially several quick length releases of the cardiomyocyte were  
640 applied where force briefly drops to zero. This stabilizes the striation pattern and allows  
641 complete  $\text{Ca}^{++}$ -equilibration before full force development is allowed to reach the plateau. To  
642 determine  $F_{\text{tot}}$ , another quick release was applied once steady state isometric force had been  
643 reached. Subsequently the cardiomyocyte was moved back into relaxing solution. Once the  
644 cardiomyocyte had fully relaxed, a step release and re-stretch was applied to record passive  
645 force ( $F_{\text{pass}}$ ). The small upward shift of the zero force level when the cardiomyocyte is moved  
646 from relaxing solution to the trough with activating solution is due to changes in surface  
647 tension of the solution in the different troughs. The zero force level is indicated by the force  
648 level during the releases when the cardiomyocyte is unloaded.

649

650

651

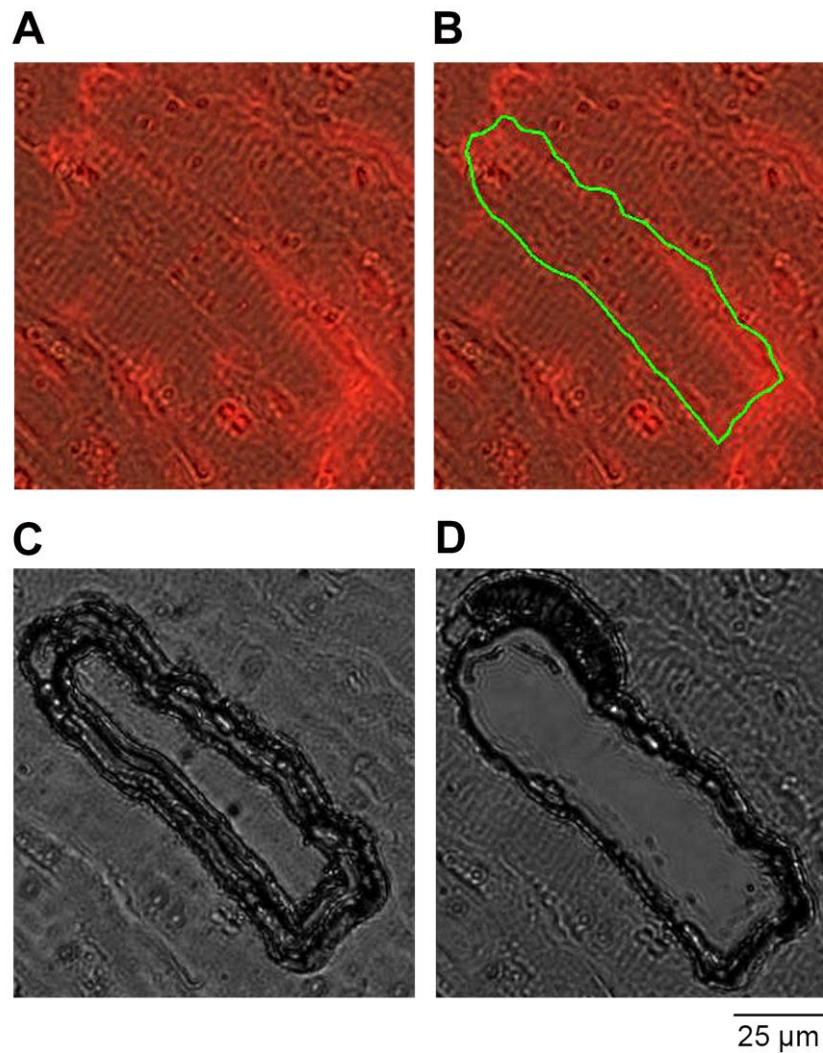

653

654

655 **Figure S2**656 *Isolation of individual cardiomyocytes from cryosections by laser capture microdissection.*657 **(A)** Superimposed fluorescence and bright field images of a cryosection of left ventricular

658 myocardium. Intercalated discs marked with anti-cadherin antibody visualized by a TRITC-

659 labelled secondary antibody. Cell borders of a cardiomyocyte delineated by superposition of

660 fluorescence signal and striation pattern. **(B)** Individual cardiomyocyte marked for dissection661 by UV laser, **(C)** dissected cell segment, **(D)** void area after cell segment was catapulted into

662 nuclease free water in the lid of a PCR tube by a pulse of defocused UV-light.

663

664

665  
666

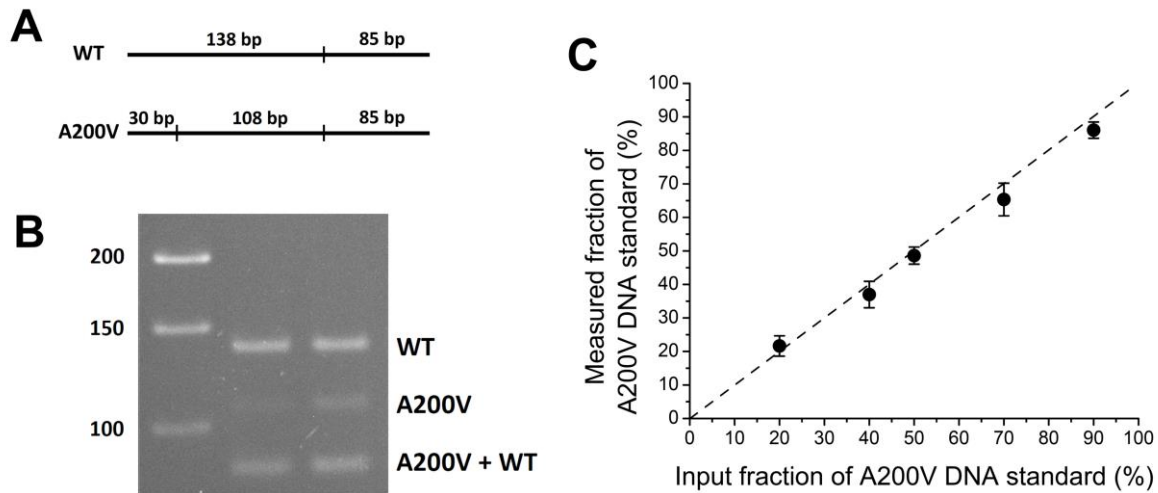

667  
668

### Figure S3

670 *Control of linearity of restriction digest approach for MYH7-mRNA-quantification of*  
671 *mutation A200V.*

672 **(A)** *Schematic of Hpy4CHI-restriction sites of PCR-product with heterozygous  $\beta$ -MyHC-*  
673 *mutation A200V: 85bp fragment for both alleles, 108bp fragment specific for mutant, and*  
674 *138bp fragment specific for wildtype. (B) Agarose gel of restriction digests used to test*  
675 *linearity of the quantification procedure for mutation A200V, as shown for other mutations*  
676 *(Tripathi et al., 2011). Left lane, equimolar standard ladder; middle and right lane, 80:20 and*  
677 *60:40 mixtures of wildtype and mutant synthetic plasmids. (C) Analysis of whole set of*  
678 *defined mixtures of mutant and wildtype synthetic plasmids. Dashed line, expected data if*  
679 *input and measured values were identical. Filled circles, experimentally determined*  
680 *percentage of mutated templates plotted vs. percentage of mutated templates put into mixtures*  
681 *from at least four independent experiments (measured fraction of mutated DNA (%)  $\pm$  SD).*

682  
683

684  
685  
686

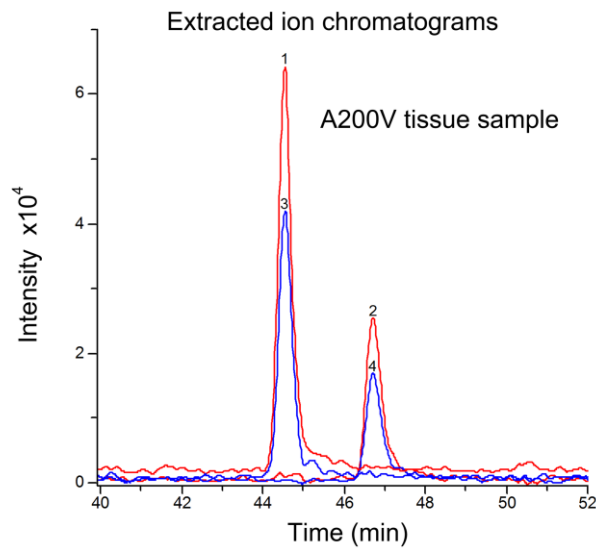

687  
688  
689

**Figure S4**

691 *Quantification of wildtype and A200V-mutated  $\beta$ -MyHC-peptides by mass spectrometry.*

692 Myosin extracted from cardiac samples was spiked with equimolar amounts of stable-isotope  
693 labelled internal standard peptides and digested with trypsin before analysis by nanoLC-  
694 ESI-MS. *Red trace*, extracted ion chromatograms (EICs) of isotope-labelled synthetic  
695 peptides. Peak 1 ( $m/z = 773.43$ ) wildtype peptide; peak 2 ( $m/z = 787.44$ ) mutant peptide. *Blue*  
696 *trace*, EICs of native peptides; peak 3 ( $m/z = 768.43$ ) wildtype peptide; peak 4 ( $m/z = 782.44$ )  
697 mutant peptide. Note that integrated peak areas of the isotope labelled synthetic standard  
698 peptides, although added in equimolar amounts, are quite different between mutant and  
699 wildtype peptides. This may be due to, e.g., different competition for ionization at the time  
700 when mutant and wildtype peptides eluate from the LC-column, or differential adsorption of  
701 mutant and wildtype peptides during preparation even in low absorption vials. Since native  
702 and isotope labelled forms eluate at the same time and the isotope labelled peptides were  
703 present already during the digest, the ratio of peak areas of the equimolar isotope labelled  
704 peptides allows accounting for any differences in behavior between mutant and wildtype  
705 peptides throughout the quantification procedure. To correct for such effects on the native  
706 peptides, the ratio of peak areas of mutant/wildtype native peptides was normalized to the  
707 intensity ratio observed for the isotope labelled synthetic standard peptides.

708  
709  
710  
711

712  
713

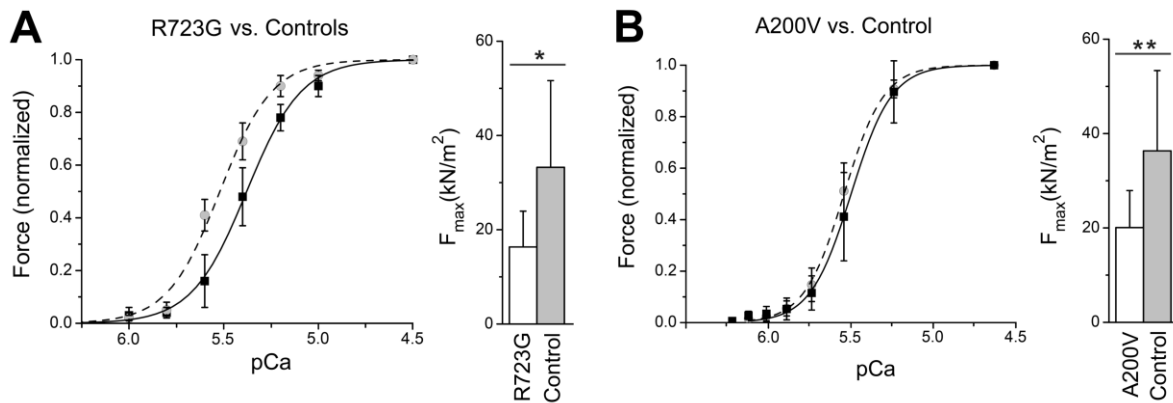

714  
715  
716

### 717 **Figure S5**

718 *Mean force-pCa relations and absolute forces generated by cardiomyocytes with  $\beta$ -MyHC-*  
719 *mutations R723G and A200V.*

720 **(A)** Force-pCa relations of cardiomyocytes with myosin mutation R723G (22  
721 cardiomyocytes; filled black symbols, solid line) vs. controls (8 cardiomyocytes; filled gray  
722 symbols, dashed solid line). The mutation causes a statistically significant shift of the force-  
723 pCa relation to the right, i.e., to significantly lower pCa<sub>50</sub>-values ( $p = 0.03$ ; paired t-test  
724 (Galbraith et al., 2010)). This indicates, on average, a reduced Ca<sup>++</sup>-sensitivity compared to  
725 controls. *Right panel*, absolute forces generated at saturating Ca<sup>++</sup>-concentrations (means  $\pm$   
726 SD). R723G myocytes generate on average significantly lower forces compared to controls ( $p$   
727 = 0.018; t-test) **(B)** Mean force-pCa relations of 19 cardiomyocytes with myosin mutation  
728 A200V (black filled symbols, solid line) vs. 17 control cardiomyocytes (grey filled symbols,  
729 dashed line). On average, the mean force pCa-relation for A200V-myocytes is shifted to the  
730 right. *Right panel*, absolute forces at saturating Ca<sup>++</sup>-concentrations which are only about half  
731 the forces seen for controls ( $p = 0.0016$ ; t-test). Note, that for both R723G and A200V  
732 cardiomyocytes the standard deviations of normalized forces at the different Ca<sup>++</sup>-  
733 concentrations are larger than for control cardiomyocytes. This is particularly prominent and  
734 statistically significant (F-test) for A200V cardiomyocytes, and results from the larger cell-to-  
735 cell variation in the R723G and A200V cardiomyocytes, respectively (cf. Figure 1a, b). As a  
736 consequence of the larger cell-to-cell variability, the average shift of the force-pCa relation of  
737 the A200V cardiomyocytes to the right, i.e., to lower Ca<sup>++</sup>-sensitivity is smaller and  
738 statistically not significant.

739  
740  
741  
742  
743  
744

745  
746

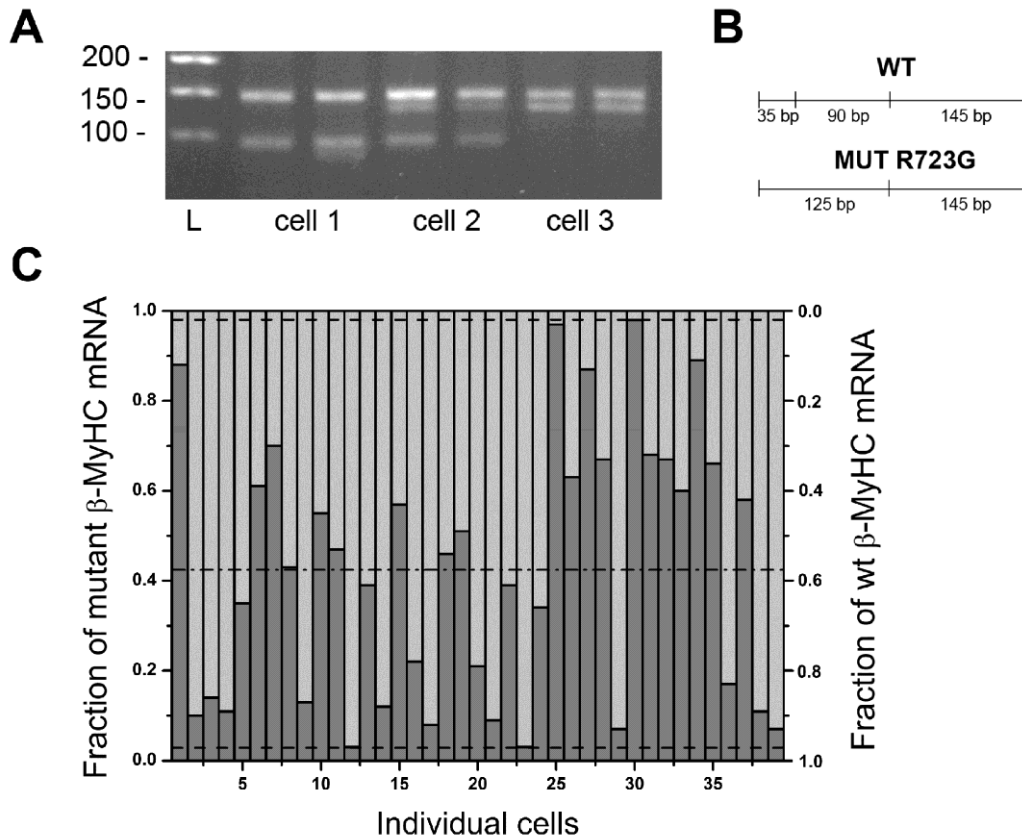

747  
748

749 **Figure S6**

750 *Large variability in fraction of R723G-mRNA and wildtype MYH7-mRNA in individual*  
751 *cardiomyocytes microdissected from cryosections of myocardium.*

752 **(A)** Sample gel of restriction digest products of 3 individual cardiomyocytes microdissected  
753 from cryo-sections of R723G-myocardium (patient III-1, family 157 in (Enjuto et al., 2000)).  
754 Lysate of each cell was divided in 2 equal aliquots and analyzed in parallel; L, DNA standard  
755 ladder. Note the marked differences in band pattern among the individual cardiomyocytes  
756 (cell 1-3) while band patterns of the two aliquots of each cell are rather similar. **(B)** Schematic  
757 of NheII-restriction sites which yields: 90bp band, from wildtype *MYH7*-mRNA; 125 bp  
758 band, from mutant *MYH7*-mRNA; 145bp band, from mutant and wildtype mRNA; 35 bp  
759 band, from wildtype *MYH7*-mRNA but outside range of gels. **(C)** Fraction of R723G-mRNA  
760 (dark gray bars; y-axis on the left of panel) and of wildtype-mRNA (light gray bars; y-axis on  
761 the right of panel) in 39 cardiomyocytes from left ventricular free wall of R723G-  
762 myocardium. *MYH7*-mRNA varies from almost pure wildtype to pure mutant.

763  
764

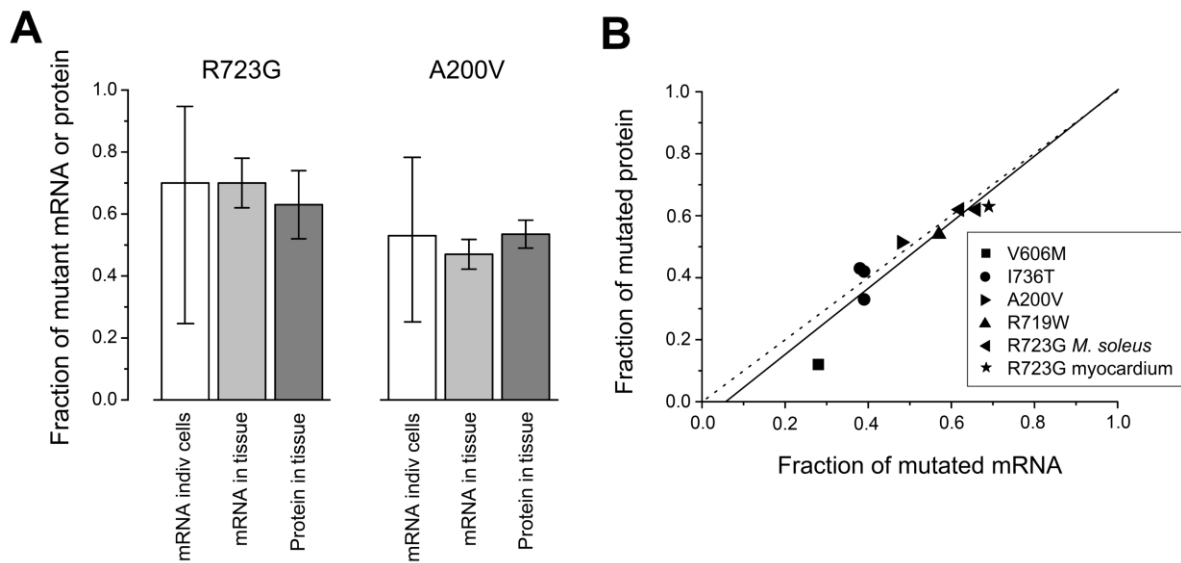

766

767

768

769

**Figure S7**

770 *Microdissected cardiomyocytes represent fractions of mutated MYH7-mRNA of all*  
 771 *cardiomyocytes within a tissue sample; fractions of mutated  $\beta$ -MyHC-protein and of mutated*  
 772 *MYH7-mRNA are very similar for several missense mutations.*

773 **(A)** Quantification of the fraction of mutated *MYH7*-mRNA and mutated  $\beta$ -MyHC (protein)  
 774 for mutation R723G and A200V. *White columns*, average of mutated mRNA in single  
 775 cardiomyocytes (for R723G the average fraction is 0.70 +SD 0.25 –SD 0.45 ( $\pm$ SD here from  
 776 logit-calculation in Figure 2c), n=35 cardiomyocytes; for A200V the average fraction is 0.53  
 777 +SD 0.25 –SD 0.28 ( $\pm$ SD here from logit-calculation in Figure 2e), n=21 cardiomyocytes;  
 778 *light gray columns*, mutated mRNA in whole tissue sections (for R723G the fraction is  
 779 0.70 $\pm$ 0.08, n=5 sections; for A200V the fraction is 0.47 $\pm$ 0.05, n=3 sections); *dark gray*  
 780 *columns*, fraction of mutated  $\beta$ -myosin protein in tissue samples as determined by mass  
 781 spectrometry. For R723G the fraction is 0.63 $\pm$ 0.11, n=2 peptide samples (digests), data from  
 782 (Tripathi et al., 2011); for A200V the fraction is 0.54 $\pm$ 0.045, n=5 peptide samples. **(B)**  
 783 Summary of the fraction of mutant  $\beta$ -MyHC-protein vs. fraction mutant *MYH7*-mRNA in  
 784 tissue samples of different HCM-related mutations in the head domain of the  $\beta$ -MyHC (all  
 785 data except for mutation A200V are from (Tripathi et al., 2011)). Filled symbols, mean values  
 786 of tissue samples or whole cryosections; solid line, linear fit to the data points; dashed line  
 787 represents exact 1:1 relation between fraction of mutated mRNA and fraction of mutated  
 788 protein.

789

790

791



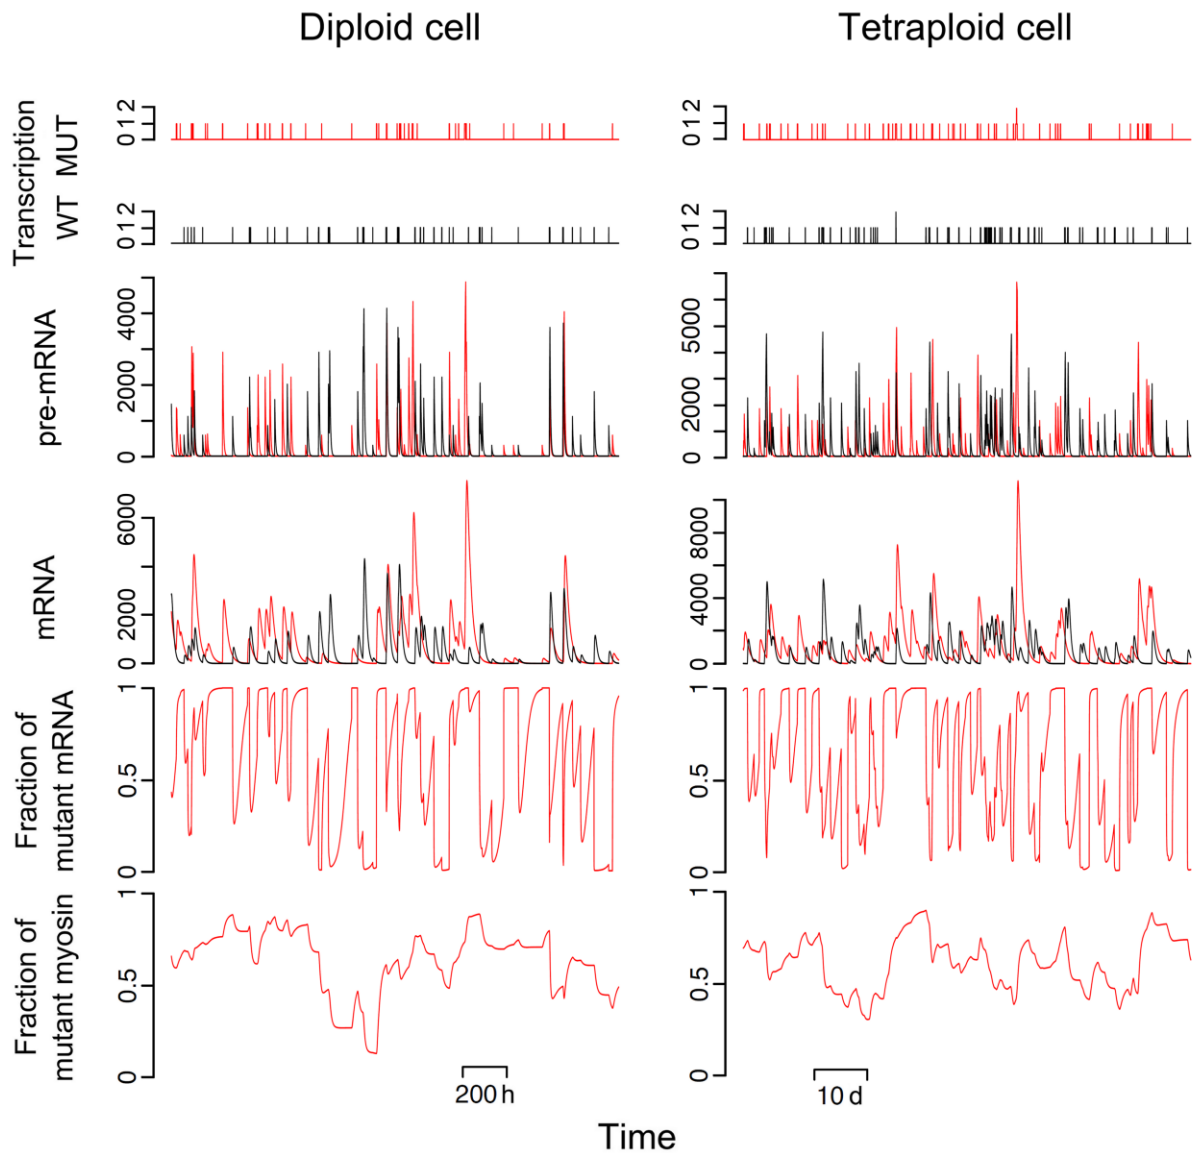

792  
793

794 **Figure S8**

795 *Time-periods of 80 days of model output for a diploid (left) and a tetraploid (right)*  
796 *cardiomyocyte, each heterozygous for  $\beta$ -MyHC-mutation R723G.*

797 Two examples of time courses predicted by stochastic, burst like transcription of *MYH7*  
798 which is independent for the mutant (MUT) and the wildtype (WT) allele in heterozygous  
799 cardiomyocytes. Panels from top to bottom show: random on/off switching of allele  
800 transcription (note that for the tetraploid cell there are two mutant and two wildtype alleles.  
801 Hence, 0, 1, and 2 represent the number of switched on alleles), resulting time course of the  
802 number of mutant and wildtype pre-mRNA molecules and mRNA molecules, fraction of  
803 mutant mRNA, and fraction of mutant myosin molecules over a time period of 80 days.  
804 Higher ploidy results in more frequent transcription pulses and somewhat smoother time  
805 courses for fraction of mutant mRNA and myosin.

806  
807

808 **3 Supplemental References**

809  
810

- 811 Ashton, W.D. (1972). *The logit transformation with special reference to its uses in bioassay*  
812 *(Griffin's statistical monographs & courses, no. 32)*. London: Hafner Pub. Co.
- 813 Bahar Halpern, K., Tanami, S., Landen, S., Chapal, M., Szlak, L., Hutzler, A., et al. (2015).  
814 Bursty gene expression in the intact mammalian liver. *Mol Cell* 58(1), 147-156. doi:  
815 10.1016/j.molcel.2015.01.027.
- 816 Becker, E., Navarro-Lopez, F., Francino, A., Brenner, B., and Kraft, T. (2007). Quantification  
817 of mutant versus wild-type myosin in human muscle biopsies using nano-LC/ESI-MS.  
818 *Anal Chem* 79(24), 9531-9538. doi: 10.1021/ac701711h.
- 819 Belin, R.J., Sumandea, M.P., Kobayashi, T., Walker, L.A., Rundell, V.L., Urboniene, D., et  
820 al. (2006). Left ventricular myofilament dysfunction in rat experimental hypertrophy  
821 and congestive heart failure. *Am J Physiol Heart Circ Physiol* 291(5), H2344-2353.  
822 doi: 10.1152/ajpheart.00541.2006.
- 823 Bergmann, O., Zdunek, S., Alkass, K., Druid, H., Bernard, S., and Frisen, J. (2011).  
824 Identification of cardiomyocyte nuclei and assessment of ploidy for the analysis of cell  
825 turnover. *Exp Cell Res* 317(2), 188-194. doi: 10.1016/j.yexcr.2010.08.017.
- 826 Boon, W.C., Petkovic-Duran, K., White, K., Tucker, E., Albiston, A., Manasseh, R., et al.  
827 (2011). Acoustic microstreaming increases the efficiency of reverse transcription  
828 reactions comprising single-cell quantities of RNA. *Biotechniques* 50(2), 116-119.  
829 doi: 10.2144/000113587.
- 830 Brenner, B. (1983). Technique for stabilizing the striation pattern in maximally calcium-  
831 activated skinned rabbit psoas fibers. *Biophys J* 41(1), 99-102. doi: 10.1016/S0006-  
832 3495(83)84411-7.
- 833 Brodsky, V., Sarkisov, D.S., Arefyeva, A.M., Panova, N.W., and Gvasava, I.G. (1994).  
834 Polyploidy in cardiac myocytes of normal and hypertrophic human hearts; range of  
835 values. *Vichows Archiv A Pathol Anat* 424(4), 429-435. doi:10.1007/BF00190566.
- 836 Enjuto, M., Francino, A., Navarro-Lopez, F., Viles, D., Pare, J.C., and Ballesta, A.M. (2000).  
837 Malignant hypertrophic cardiomyopathy caused by the Arg723Gly mutation in beta-  
838 myosin heavy chain gene. *J Mol Cell Cardiol* 32(12), 2307-2313. doi:  
839 10.1006/jmcc.2000.1260.
- 840 Everett, A.W., Clark, W.A., Chizzonite, R.A., and Zak, R. (1983). Change in synthesis rates  
841 of alpha- and beta-myosin heavy chains in rabbit heart after treatment with thyroid  
842 hormone. *J Biol Chem* 258(4), 2421-2425. PMID: 6337155.
- 843 Fohr, K.J., Warchol, W., and Gratzl, M. (1993). Calculation and control of free divalent  
844 cations in solutions used for membrane fusion studies. *Methods Enzymol.* 221, 149-  
845 157.
- 846 Galbraith, S., Daniel, J.A., and Vissel, B. (2010). A study of clustered data and approaches to  
847 its analysis. *J Neurosci* 30(32), 10601-10608. doi: 10.1523/JNEUROSCI.0362-  
848 10.2010.
- 849 Hamdani, N., Borbely, A., Veenstra, S.P., Kooij, V., Vrydag, W., Zaremba, R., et al. (2010).  
850 More severe cellular phenotype in human idiopathic dilated cardiomyopathy  
851 compared to ischemic heart disease. *J Muscle Res Cell Motil* 31(4), 289-301. doi:  
852 10.1007/s10974-010-9231-8.
- 853 Herget, G.W., Neuburger, M., Plagwitz, R., and Adler, C.P. (1997). DNA content, ploidy  
854 level and number of nuclei in the human heart after myocardial infarction. *Cardiovasc*  
855 *Res* 36(1), 45-51. doi: 10.1016/S0008-6363(97)00140-5.
- 856 Kraft, T., Montag, J., Radocaj, A., and Brenner, B. (2016). Hypertrophic Cardiomyopathy:  
857 Cell-to-Cell Imbalance in Gene Expression and Contraction Force as Trigger for

858 Disease Phenotype Development. *Circ Res* 119(9), 992-995. doi:  
859 10.1161/CIRCRESAHA.116.309804.

860 Kraft, T., Paalberends, E.R., Boontje, N., S., T., Brandis, A., Montag, J., et al. (2013).  
861 Familial Hypertrophic Cardiomyopathy: Functional effects of myosin mutation  
862 R723G in cardiomyocytes. *J Mol Cell Cardiol* 57, 13-22. doi:  
863 10.1016/j.yjmcc.2013.01.001.

864 Lyubimova, A., Itzkovitz, S., Junker, J.P., Fan, Z.P., Wu, X., and van Oudenaarden, A.  
865 (2013). Single-molecule mRNA detection and counting in mammalian tissue. *Nat*  
866 *Protoc* 8(9), 1743-1758. doi: 10.1038/nprot.2013.109.

867 R, T.C. (2013). "R Core Team. A language and environment for statistical computing", (ed.)  
868 R. R Foundation for Statistical Computing, Vienna, Austria. [http://www.R-](http://www.R-project.org/)  
869 [project.org/](http://www.R-project.org/).

870 Raj, A., Peskin, C.S., Tranchina, D., Vargas, D.Y., and Tyagi, S. (2006). Stochastic mRNA  
871 synthesis in mammalian cells. *PLoS Biol* 4(10), e309. doi:  
872 10.1371/journal.pbio.0040309.

873 Schwanhauser, B., Busse, D., Li, N., Dittmar, G., Schuchhardt, J., Wolf, J., et al. (2011).  
874 Global quantification of mammalian gene expression control. *Nature* 473(7347), 337-  
875 342. doi: 10.1038/nature10098.

876 Sharova, L.V., Sharov, A.A., Nedorezov, T., Piao, Y., Shaik, N., and Ko, M.S. (2009).  
877 Database for mRNA half-life of 19 977 genes obtained by DNA microarray analysis  
878 of pluripotent and differentiating mouse embryonic stem cells. *DNA Res* 16(1), 45-58.  
879 doi: 10.1093/dnares/dsn030.

880 Thompson, J.R., Marcelino, L.A., and Polz, M.F. (2002). Heteroduplexes in mixed-template  
881 amplifications: formation, consequence and elimination by 'reconditioning PCR'.  
882 *Nucleic Acids Res* 30(9), 2083-2088. PMID: PMC113844.

883 Tripathi, S., Schultz, I., Becker, E., Montag, J., Borchert, B., Francino, A., et al. (2011).  
884 Unequal allelic expression of wild-type and mutated beta-myosin in familial  
885 hypertrophic cardiomyopathy. *Basic Res Cardiol* 106, 1041-1055.  
886 doi:10.1007/s00395-011-0205-9.

887 van der Velden, J., Papp, Z., Zaremba, R., Boontje, N.M., de Jong, J.W., Owen, V.J., et al.  
888 (2003). Increased Ca<sup>2+</sup>-sensitivity of the contractile apparatus in end-stage human  
889 heart failure results from altered phosphorylation of contractile proteins. *Cardiovasc*  
890 *Res* 57(1), 37-47. doi: 10.1016/S0008-6363(02)00606-5.

891 WMA (1997). World Medical Association declaration of Helsinki. *Cardiov. Res.* 35, 2-3. doi:  
892 10.1016/S0008-6363(97)00109-0.  
893  
894
